# Supplementary material for: S-doping Fe–Ce composites derived from PBA to accelerate Fe(iii)/Fe(ii) cycle in the Fenton-like process
Source: Royal Society of Chemistry journal article supplement (doi:10.1039/d3en00788j), 2023-11-30
Supplement: d3en00788j1.pdf [file d3en00788j1.pdf]

# **S-doping Fe-Ce composites derived from PBA to accelerate Fe(III)/Fe(II) cycle in the Fenton-like process**

Jinli Qiu <sup>a, b, 1</sup>, Huifang Chan <sup>a, 1</sup>, Wenting Zheng <sup>a</sup>, Yao Feng <sup>a</sup>, Fuqiang Liu <sup>a, \*†</sup>

<sup>a</sup> State Key Laboratory of Pollution Control and Resource Reuse, School of the Environment, Nanjing University, Nanjing 210023, China

<sup>b</sup> Jiangsu Province Engineering Research Center of Environmental Risk Prevention and Emergency Response Technology, School of the Environment, Nanjing Normal University, Jiangsu 210023, China

1 Jinli Qiu and Huifang Chan are co-first authors.

\* Corresponding author.

E-mail address: [lfq@nju.edu.cn](mailto:lfq@nju.edu.cn) (Fuqiang Liu).

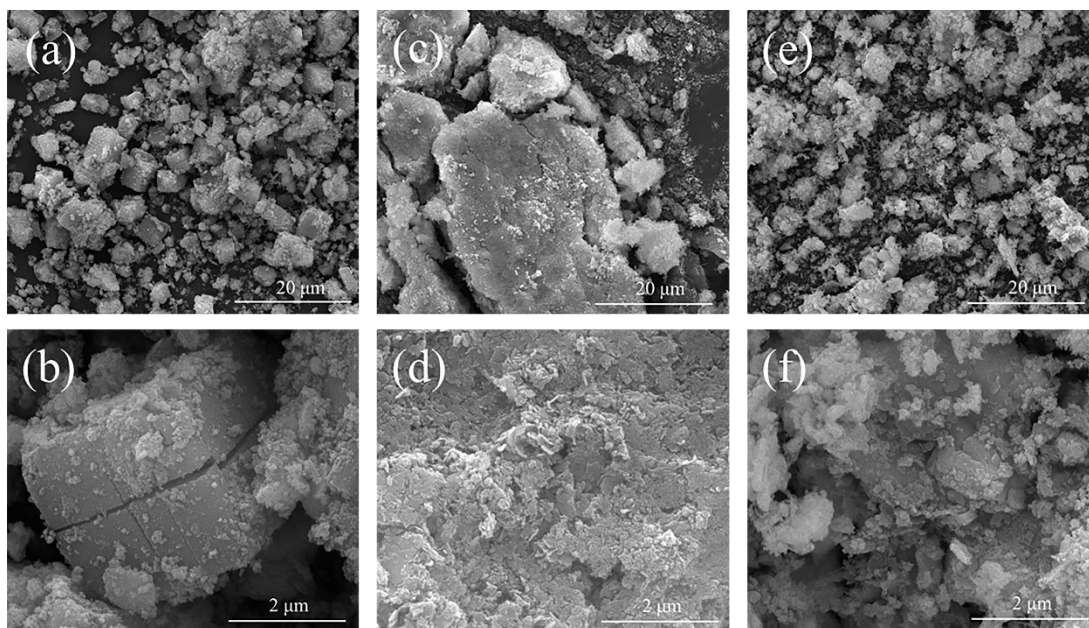

Fig. S1 SEM images of (a, b) Fe-Ce-S-H, (c, d) Fe-Ce-N and (e, f) Fe-Ce-S-N.

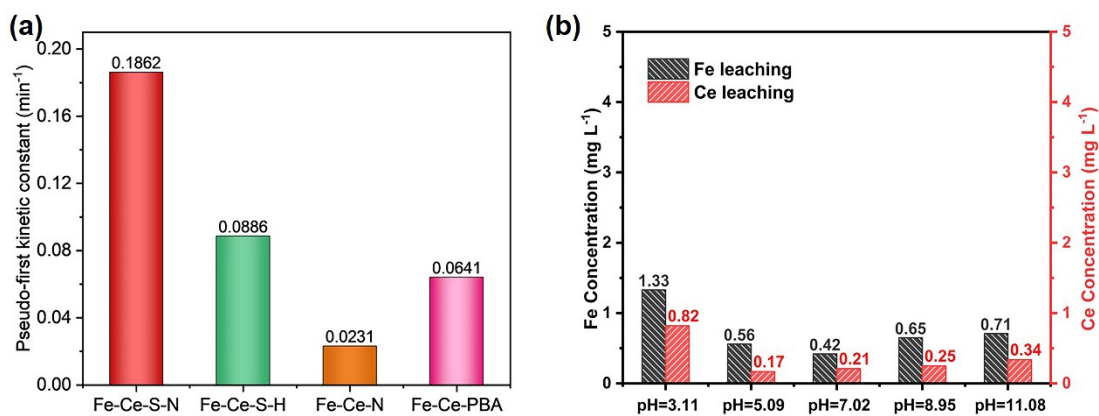

Fig. S2 (a) Reaction kinetic rate constants of SMZ under various reaction systems; (b) metal leaching concentration of Fe-Ce-S-N at different pH. Reaction conditions:  $[\text{SMZ}] = 20 \text{ mg L}^{-1}$ ,  $[\text{Catalyst}] = 0.2 \text{ g L}^{-1}$ ,  $[\text{H}_2\text{O}_2] = 15 \text{ mM}$ ,  $\text{pH} = 5.0$ ,  $T = 25 \text{ }^\circ\text{C}$ .

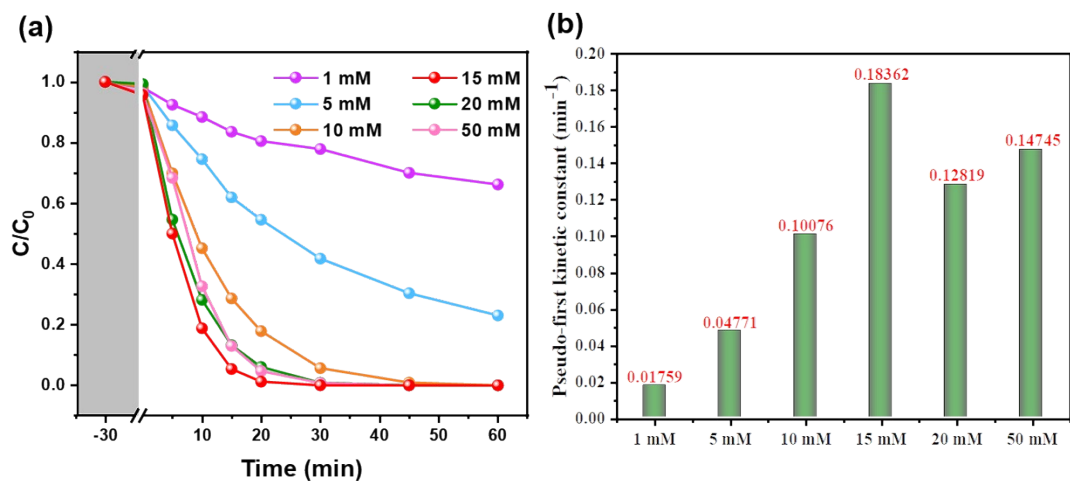

Fig. S3 Removal and reaction kinetic rate constants of SMZ under different  $H_2O_2$  concentration.

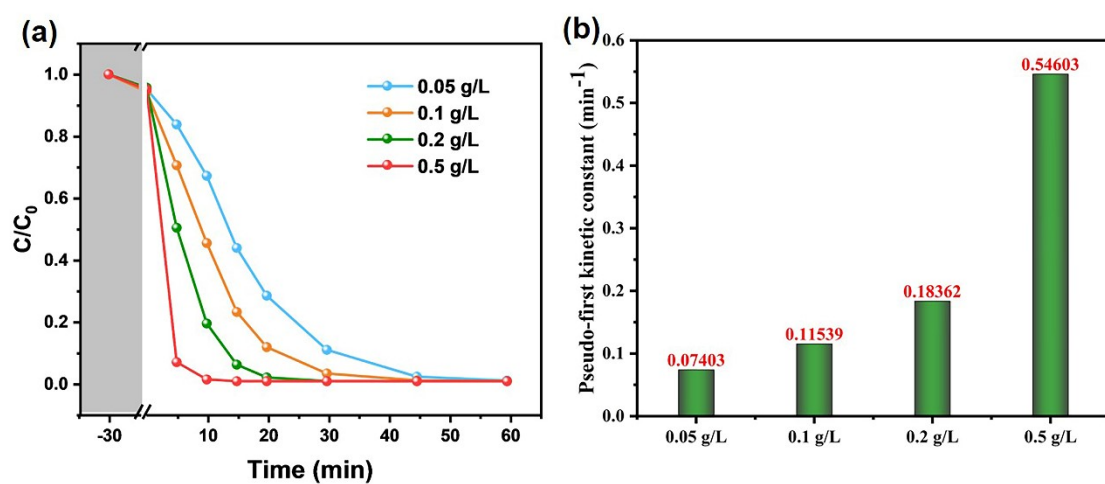

Fig. S4 Removal and reaction kinetic rate constants of SMZ under different catalyst dosage.

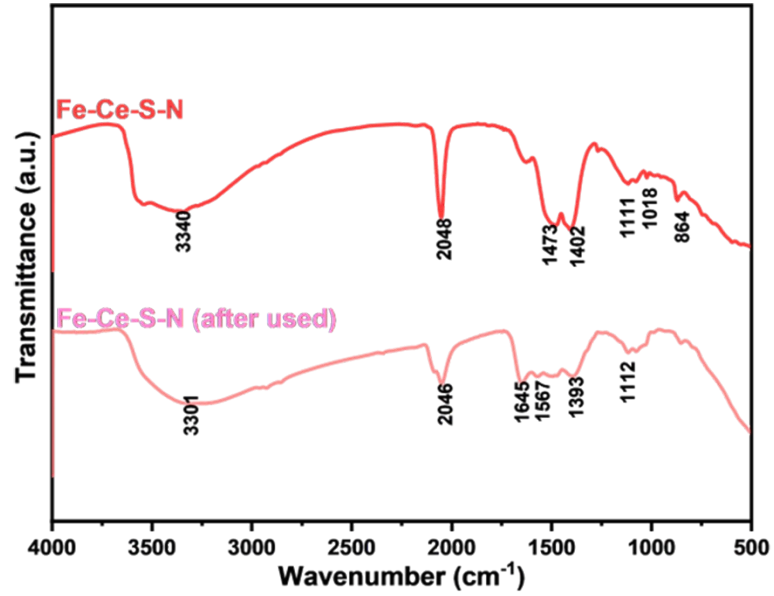

Fig. S5 FT-IR spectra of Fe-Ce-S-N catalyst before and after cycling reactions.

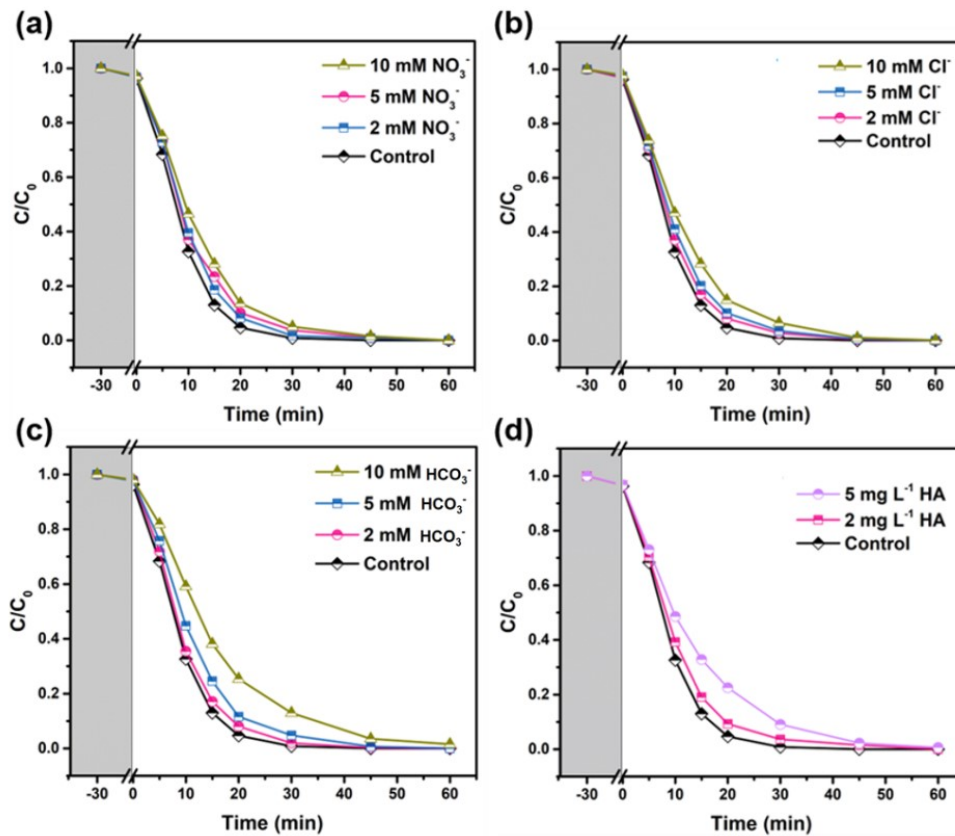

Fig. S6 Influence of inorganic anions and HA on SMZ degradation in the Fe-Ce-S-N/H<sub>2</sub>O<sub>2</sub> system.

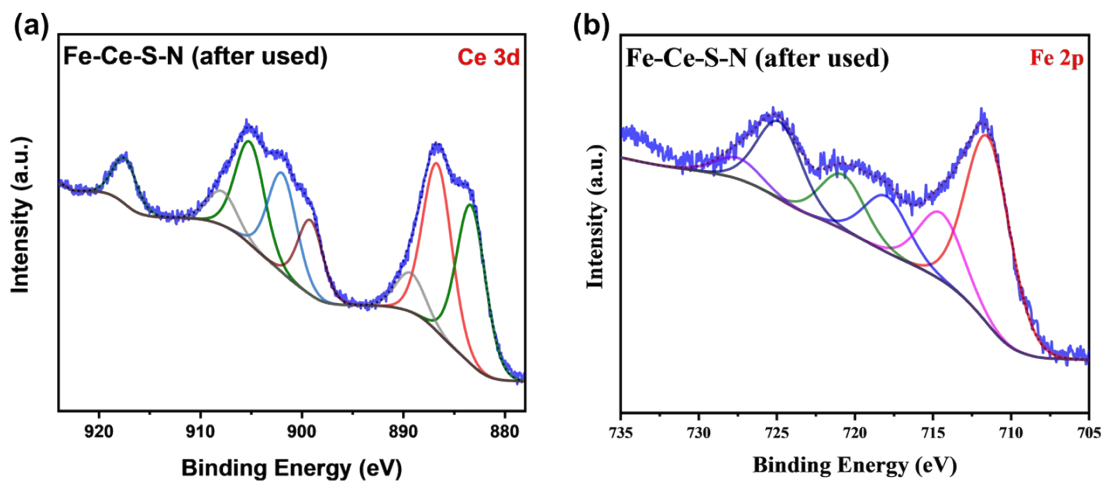

Fig. S7 High-resolution (a) Ce 3d and (b) Fe 2p XPS spectra of Fe-Ce-S-N after used.

**Table S1** Metal leaching concentrations of catalysts obtained from different synthesized precursors

| catalysts                | Fe-Ce-PBA | Fe-Ce-S-N | Fe-Ce-S-H | Fe-Ce-N |
|--------------------------|-----------|-----------|-----------|---------|
| Fe (mg L <sup>-1</sup> ) | 1.49      | 0.56      | 1.86      | 0.33    |
| Ce (mg L <sup>-1</sup> ) | 0.54      | 0.17      | 0.73      | 0.09    |

**Table S2.** The corresponding Fe and Ce leaching concentration in different cycles.

| Cycle           | Fe (mg L <sup>-1</sup> ) | Ce (mg L <sup>-1</sup> ) |
|-----------------|--------------------------|--------------------------|
| 1 <sup>st</sup> | 0.56                     | 0.17                     |
| 2 <sup>nd</sup> | 0.44                     | 0.14                     |
| 3 <sup>rd</sup> | 0.21                     | 0.09                     |
| 4 <sup>th</sup> | 0.19                     | 0.02                     |

**Table S3.** Ratio of Fe(II)/Fe(III) and Ce(III)/Ce(IV) in Fe-Ce-S-N before and after used according to XPS characterization.

|                                                         | Fe-Ce-S-N | Fe-Ce-S-N (used) |
|---------------------------------------------------------|-----------|------------------|
| Fe <sup>II</sup> / Fe <sup>II</sup> +Fe <sup>III</sup>  | 0.282     | 0.373            |
| Ce <sup>III</sup> / Ce <sup>III</sup> +Ce <sup>IV</sup> | 0.726     | 0.530            |

**Table S4.** Toxicity classification according to the Globally Harmonized System.

| Toxicity range (ppm)                               | Classification |
|----------------------------------------------------|----------------|
| LC <sub>50</sub> /EC <sub>50</sub> /ChV >100       | Not harmful    |
| 10 < LC <sub>50</sub> /EC <sub>50</sub> /ChV ≤ 100 | Harmful        |
| 1 < LC <sub>50</sub> /EC <sub>50</sub> /ChV ≤ 10   | Toxic          |
| LC <sub>50</sub> /EC <sub>50</sub> /ChV ≤ 1        | Very toxic     |

**Table S5.** Predicted acute and chronic toxicity of SMZ and its products.

| Compound | Acute toxicity (mg L <sup>-1</sup> ) |                             |                                 | Chronic toxicity (ChV) (mg L <sup>-1</sup> ) |              |             |
|----------|--------------------------------------|-----------------------------|---------------------------------|----------------------------------------------|--------------|-------------|
|          | Fish (LC <sub>50</sub> )             | Daphnid (LC <sub>50</sub> ) | Green Algae (EC <sub>50</sub> ) | Fish                                         | Daphnid      | Green Algae |
| SMZ      | 410.762                              | 1.872                       | 6.615                           | 2.337                                        | 0.086        | 10.402      |
| P1       | 5024.836                             | 17859.785                   | 91.284                          | 1.899                                        | 186.877      | 29.324      |
| P2       | 72773.367                            | 553000                      | 926.545                         | 10.326                                       | 1948.60<br>2 | 148.545     |
| P3       | 23716.477                            | 136000                      | 343.806                         | 4.812                                        | 715.978      | 71.042      |
| P4       | 76.877                               | 91.187                      | 2.335                           | 0.12                                         | 4.597        | 2.049       |
| P5       | 687.255                              | 1603.323                    | 15.206                          | 0.447                                        | 30.668       | 7.182       |
| P6       | 2152.689                             | 5945                        | 44.009                          | 1.126                                        | 89.292       | 17.809      |
| P7       | 8171.387                             | 89.181                      | 5959.974                        | 2348.73<br>1                                 | 533.427      | 305.021     |
| P8       | 443.424                              | 0.735                       | 3.637                           | 3.637                                        | 0.051        | 5.375       |
| P9       | 54.649                               | 1.889                       | 29.022                          | 6.880                                        | 2.556        | 2.867       |
| P10      | 1558.699                             | 781.268                     | 585.355                         | 131.267                                      | 53.523       | 68.128      |
| P11      | 4086.931                             | 329.657                     | 589.029                         | 782.461                                      | 18.524       | 147.559     |
| P12      | 266000                               | 15422.803                   | 53035                           | 140000                                       | 628.185      | 10446.307   |
| P13      | 20634.932                            | 135000                      | 281.289                         | 3.534                                        | 588.522      | 51.538      |
| P14      | 167.761                              | 410.048                     | 0.731                           | 9.234                                        | 1.594        | 0.175       |
| P15      | 306.332                              | 483.427                     | 8.139                           | 0.33                                         | 16.189       | 5.499       |

Not harmful   
 Harmful   
 Toxic   
 Very toxic
